# Supplementary material for: ERK2 phosphorylation of EBNA1 serine 383 residue is important for EBNA1-dependent transactivation
Source: PubMed Central journal article supplement (PMC5041921; doi:10.18632/oncotarget.8177), 2016-03-18
Supplement: oncotarget-07-25507-s001.pdf [file oncotarget-07-25507-s001.pdf]

## SUPPLEMENTARY INFORMATION

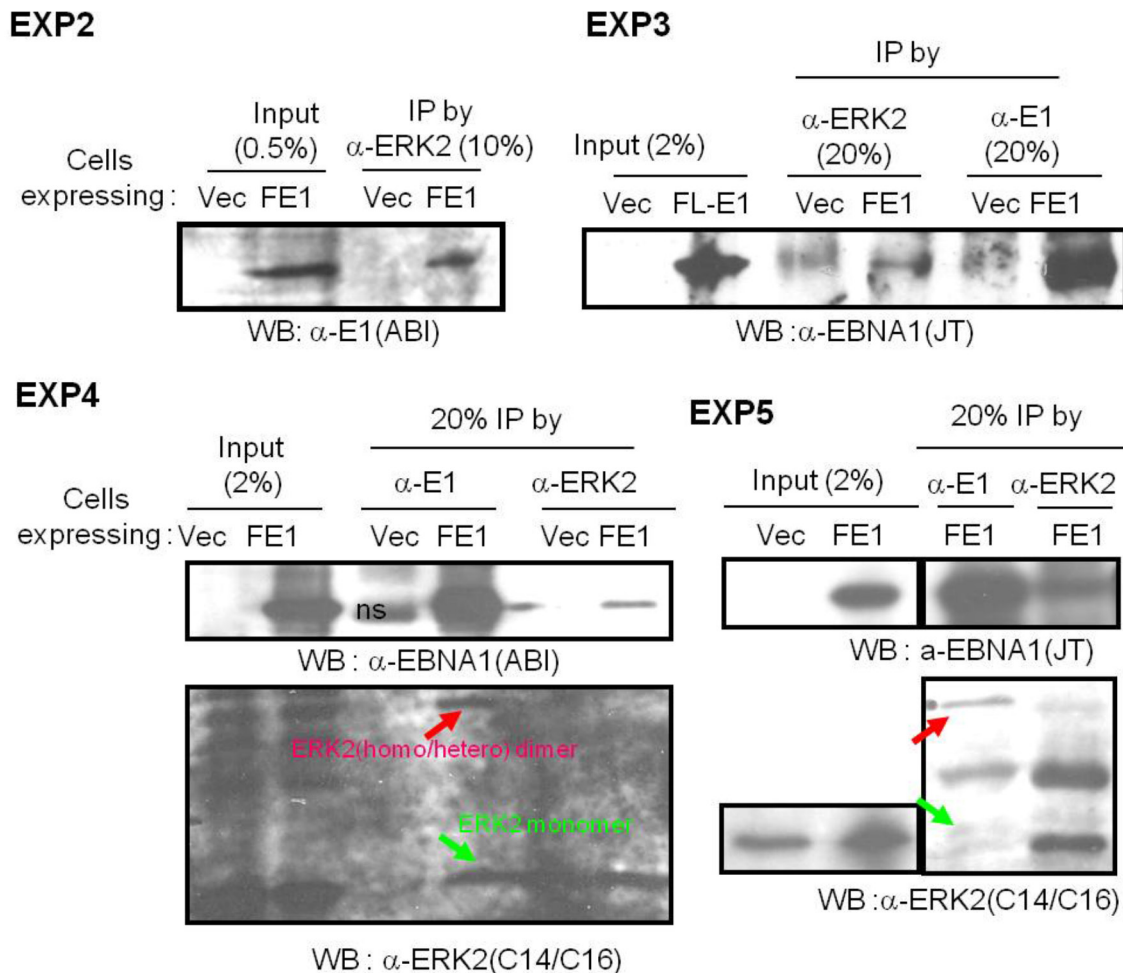

**Supplementary Figure S1: Additional data supporting EBNA1-ERK2 interaction *in vivo*.** A. (EXP 2) Immune precipitation (IP) by anti-ERK2 antibody of vector- or FLAG-EBNA1 (FE1)-expressing BJAB B cell extracts followed by probing with anti-EBNA1 antibody. (EXP 3) Reciprocal IPs by anti-ERK2 and anti-EBNA1 antibodies of vector- or FE1-expressing BJAB B cell extracts followed by probing with anti-EBNA1 (JT human polyclonal serum). B. (EXP 4, 5) Reciprocal IPs and western blots with indicated antibodies. Note that, there were two species of EBNA1-bound ERK2 on SDS-PAGE: a larger ERK2 (likely ERK2 homodimer or heterodimer in complex with EBNA1; red arrow), and a smaller ERK2 of its original size (green arrow). The slower migrating ERK2 likely results from insufficient denaturation before sample loading.

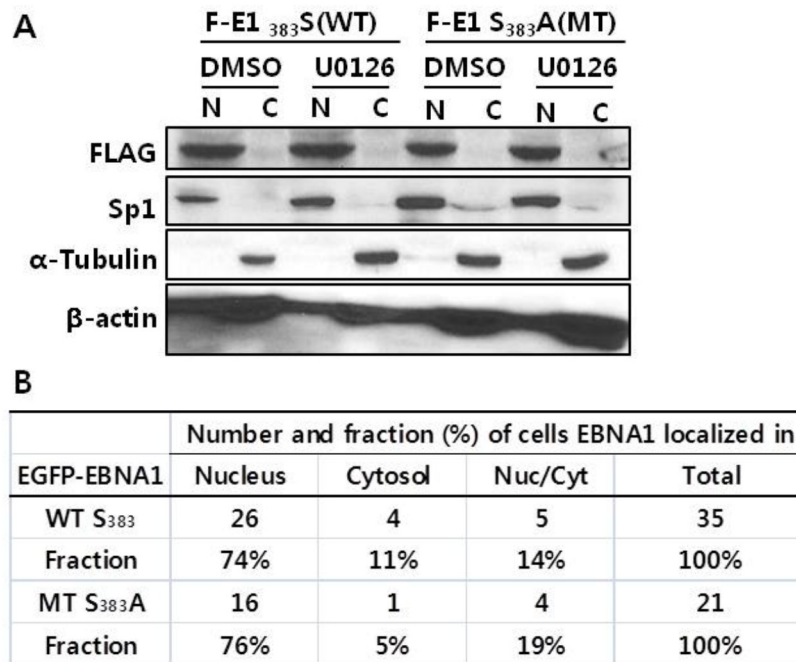

**Supplementary Figure S2: Effect of U0126 or S383A mutation on EBNA1 nuclear and cytoplasmic localization.** **A.** BJAB cells stably expressing FLAG-EBNA1 S383 WT (FE1 S383) or S383A MT (FE1 A383) were treated with DMSO (-) or U0126 (10  $\mu$ M) for 4 days. Nuclear (N) and cytoplasmic (C) fractions were isolated and probed with mouse antibodies against EBNA1, Sp1 (a nuclear protein marker),  $\alpha$ -tubulin (cytoplasmic protein marker) and  $\beta$ -actin (a protein loading control). **B.** BJAB cells expressing EGFP-EBNA1 S383 WT or S383A MT in log phase were visualized by confocal microscopy. EBNA1 subcellular localization for at least 21 individual cells was determined. Mutation did not significantly affect EBNA1 nuclear or cytoplasmic localization.

Supplementary Table S1: List of primers used for siRNA construction, site-directed mutagenesis and expression in this study

| Usage for                 | Name                                          | strand                | Sequence (5' to 3')                          |                                               |
|---------------------------|-----------------------------------------------|-----------------------|----------------------------------------------|-----------------------------------------------|
| siRNA                     | siERK1-1                                      | Forward               | CAUGAGAGAUGUCUACAUUUU                        |                                               |
|                           |                                               | Reverse               | AAUGUAGACAUCUCUCAUGUU                        |                                               |
|                           | siERK1-2                                      | Forward               | CUGUACAAGUUGCUGAAAAAU                        |                                               |
|                           |                                               | Reverse               | UUUUCAGCAACUUGUACAGUU                        |                                               |
|                           | siERK1-3                                      | Forward               | GCUUCCUGACGGAGUAUGUUU                        |                                               |
|                           |                                               | Reverse               | ACAUACUCCGUCAGGAAGCUU                        |                                               |
|                           | siERK2-1                                      | Forward               | GAACAUCAUUGGAAUCAUUU                         |                                               |
|                           |                                               | Reverse               | AUUGAUUCCAAUGAUGUUCUU                        |                                               |
|                           | siERK2-2                                      | Forward               | CAA AUGAAAGAUGUAUAUAUU                       |                                               |
|                           |                                               | Reverse               | UAUAUACAUCUUUCAUUUGUU                        |                                               |
|                           | siERK2-3                                      | Forward               | GCAGAAAUGCUUUCUAACAUI                        |                                               |
|                           |                                               | Reverse               | UGUUAGAAAGCAUUUCUGCUU                        |                                               |
|                           | Negative control                              | Forward               | ACGUGACACGUUCGGAGAAUU                        |                                               |
|                           |                                               | Reverse               | UUCUCCGAACGUGUCACGUUU                        |                                               |
| Site-directed mutagenesis | S <sub>383</sub> A                            | Forward               | GAAAAGAGGCCAGGGCTCCAGTAGTCAGTCATC            |                                               |
|                           |                                               | Reverse               | GATGACTGACTACTGGGAGCCCTGGGCCTCTTTTC          |                                               |
|                           | S <sub>383</sub> D                            | Forward               | GAAAAGAGGCCAGGGATCCAGTAGTC                   |                                               |
|                           |                                               | Reverse               | GACTACTGGGATCCCTGGGCCTCTTTTC                 |                                               |
|                           | L <sub>526</sub> P                            | Forward               | CGAGGAACTGCCCTGCTATTCCACAATGTCGTC            |                                               |
|                           |                                               | Reverse               | GACGACATTGTGGAATAGCAGGGGCAGTTCCTCG           |                                               |
|                           | 526PAS <sub>528</sub> (DM)                    | Forward               | CGAGGAACTGCCCTGCTAGTCCACAATGTCGTC            |                                               |
|                           |                                               | Reverse               | GACGACATTGTGGACTAGCAAGGGCAGTTCCTCG           |                                               |
|                           | T <sub>582</sub> F                            | Forward               | CGATTAAGGACTTTTGTATGACAAGCCCGC               |                                               |
|                           |                                               | Reverse               | GCGGGCTTTGTCATAACAAGTCCTTAATCG               |                                               |
|                           | * <sub>521</sub> AAGTAPAS <sub>528</sub> (QM) | Forward               | TCCCTTTACAACCTAGCGGCAGGAACTGCCCTGCT          |                                               |
|                           |                                               | Reverse               | AGCAGGGGCAGTTCCTGCCGCTAGGTTGTAAAGGGA         |                                               |
|                           | Expression                                    | E1 a.a. 459-607 (18a) | forward                                      | CGTCGACATATGCGCAAAAAGGAGGGTGGTTTG             |
|                           |                                               |                       | reverse                                      | CGTCGAAAGCTTTCAAGGCAAATCTACTCCA<br>TCGTCAAAGC |
| E1 a.a. 379-607 (42b)     |                                               | forward               | CGTCGACATATG AAGAGGCCAGGAGTCCCA<br>GTAGTCAG  |                                               |
|                           |                                               | reverse               | CGTCGAAAGCTTTCACCTCCTGCCCTTCCTCAC<br>CCTCATC |                                               |
| E1 a.a. 386-641 (42c)     |                                               | forward               | CGTCGACATATGCAGTCATCATCCTCCGGGTCT<br>CCACCG  |                                               |
|                           |                                               | reverse               | CGTCGAAAGCTTTCACCTCCTGCCCTTCCTCACCC<br>TCATC |                                               |

\*Template for QM was DM, Mutated sites are underlined
